# Supplementary material
Source: Research Square preprint supplement (doi:10.21203/rs.3.rs-9148210/v1)
Supplement: Supplementary file 1 [file ef925a81ba85fe0df17d29fb.docx]

**Supplementary Information**

**To the actual accuracy of structural parameters in single-crystal diffraction studies**

**and possible origins of their systematic errors**

**Y.L. Slovokhotov1,2*, I.F. Shishkov3, E.P. Altova3, Yu.V. Novakovskaya3****

*1Trapeznikov Institute of Control Science, Russian Acad. Sci., Moscow*

*2Department of Material Sciences, Lomonosov Moscow State University, Moscow*

*3Department of Chemistry, Lomonosov Moscow State University, Moscow*

E-mails: [yurislovo@yandex.ru](mailto:yurislovo@yandex.ru), [jvnovakovskaya@gmail.com](mailto:jvnovakovskaya@gmail.com)

**1**

**5**

**3**

A1

A6

**6**

**2**

D3

A5

A4

A2

A3

D1

D6

D5

D4

D2

**4**

Figure S1. Geometric parameters of naphthalene molecule,‾1 special position in a crystal (*vide infra*)

**Atom numbering and geometric parameters in Table S1**

Bond distances

D1 = DIST1, D2 = DIST2, D3 = DIST3, D4 = DIDST4, D5 = DIST5, D6 = DIST6/

Deviations of atoms from the least-square plane of the molecule

Atom **1**: DIST7, atom **2**: DIST8, atom **3**: DIST9, atom **4**: DIST10, atom **5**: DIST11, atom **6**: DIST12

Bond angles

A1 = ANG1, A2 = ANG2, A3 = ANG3, A4 = ANG4, A5 = ANG5, A6 = ANG6

**Table S1**

Parameters of naphthalene C10H8 molecules according to high-precision single crystal diffraction studies retrieved from CSD

|  | ***Refcode*** | | | ***ANG1*** | | ***ANG2*** | | ***ANG3*** | | ***ANG4*** | | ***ANG5*** | | ***ANG6*** | |
| --- | --- | --- | --- | --- | --- | --- | --- | --- | --- | --- | --- | --- | --- | --- | --- |
|  |  | | |  | |  | |  | |  | |  | |  | |
| 1 | NAPHTA04 | | | 119,041 | | 119,294 | | 120,255 | | 120,414 | | 120,731 | | 120,264 | |
| 2 | NAPHTA06 | | | 118,931 | | 119,338 | | 120,436 | | 120,407 | | 120,522 | | 120,363 | |
| 3 | NAPHTA07 | | | 118,907 | | 119,338 | | 120,475 | | 120,413 | | 120,554 | | 120,31 | |
| 4 | NAPHTA08 | | | 118,933 | | 119,258 | | 120,363 | | 120,513 | | 120,696 | | 120,234 | |
| 5 | NAPHTA09 | | | 118,802 | | 119,382 | | 120,439 | | 120,382 | | 120,75 | | 120,242 | |
| 6 | NAPHTA10 | | | 118,915 | | 119,265 | | 120,262 | | 120,362 | | 120,853 | | 120,339 | |
| 7 | NAPHTA15 | | | 119,039 | | 119,278 | | 120,571 | | 120,512 | | 120,388 | | 120,21 | |
| 8 | NAPHTA16 | | | 119,026 | | 119,216 | | 120,65 | | 120,586 | | 120,309 | | 120,211 | |
| 9 | NAPHTA17 | | | 119,042 | | 119,218 | | 120,627 | | 120,582 | | 120,311 | | 120,219 | |
| 10 | NAPHTA18 | | | 119,079 | | 119,178 | | 120,617 | | 120,619 | | 120,283 | | 120,223 | |
| 11 | NAPHTA23 | | | 118,952 | | 119,298 | | 120,623 | | 120,554 | | 120,393 | | 120,177 | |
| 12 | NAPHTA24 | | | 118,967 | | 119,24 | | 120,657 | | 120,604 | | 120,372 | | 120,157 | |
| 13 | NAPHTA25 | | | 118,97 | | 119,254 | | 120,633 | | 120,57 | | 120,394 | | 120,178 | |
| 14 | NAPHTA26 | | | 118,971 | | 119,139 | | 120,725 | | 120,648 | | 120,32 | | 120,195 | |
| 15 | NAPHTA27 | | | 118,987 | | 119,069 | | 120,767 | | 120,707 | | 120,263 | | 120,205 | |
| 16 | NAPHTA28 | | | 118,961 | | 119,04 | | 120,778 | | 120,712 | | 120,297 | | 120,21 | |
| 17 | NAPHTA29 | | | 119,01 | | 118,978 | | 120,754 | | 120,722 | | 120,332 | | 120,203 | |
| 18 | NAPHTA30 | | | 118,987 | | 118,897 | | 120,77 | | 120,774 | | 120,354 | | 120,217 | |
| 19 | NAPHTA31 | | | 118,93 | | 119,358 | | 120,607 | | 120,528 | | 120,396 | | 120,179 | |
| 20 | NAPHTA32 | | | 118,944 | | 119,235 | | 120,693 | | 120,655 | | 120,32 | | 120,151 | |
| 21 | NAPHTA33 | | | 119,196 | | 118,902 | | 120,924 | | 120,683 | | 120,078 | | 120,213 | |
| 22 | NAPHTA34 | | | 119,233 | | 119,153 | | 120,443 | | 120,528 | | 120,445 | | 120,196 | |
| 23 | NAPHTA35 | | | 119,15 | | 119,093 | | 120,486 | | 120,495 | | 120,358 | | 120,417 | |
| 24 | NAPHTA36 | | | 119,18 | | 118,973 | | 120,77 | | 120,564 | | 119,917 | | 120,595 | |
| ***Refcode*** | | ***DIST1 (D)*** | ***DIST10 (X)*** | | ***DIST11 (X)*** | | ***DIST12 (X)*** | | ***DIST2 (D)*** | | ***DIST3 (D)*** | | ***DIST4 (D)*** | | ***DIST5 (D)*** | | ***DIST6 (D)*** | ***DIST7 (X)*** | ***DIST8 (X)*** | ***DIST9 (X)*** | ***R-factor (R)*** | ***Study Temp. (I)*** |
|  | |  |  | |  | |  | |  | |  | |  | |  | |  |  |  |  |  |  |
| NAPHTA04 | | 1,422 | 0,003 | | 0 | | 0,002 | | 1,423 | | 1,423 | | 1,378 | | 1,376 | | 1,412 | 0,001 | 0,001 | 0,002 | 4,7 | 123 |
| NAPHTA06 | | 1,422 | 0,002 | | 0,001 | | 0,001 | | 1,422 | | 1,425 | | 1,376 | | 1,375 | | 1,415 | 0,003 | 0 | 0,003 | 3,8 | 92 |
| NAPHTA07 | | 1,422 | 0,002 | | 0,001 | | 0,001 | | 1,423 | | 1,424 | | 1,376 | | 1,376 | | 1,414 | 0,003 | 0,001 | 0,003 | 4 | 109 |
| NAPHTA08 | | 1,423 | 0,002 | | 0,002 | | 0,001 | | 1,421 | | 1,424 | | 1,375 | | 1,375 | | 1,412 | 0,002 | 0,001 | 0,003 | 3,8 | 143 |
| NAPHTA09 | | 1,423 | 0,002 | | 0,002 | | 0,001 | | 1,418 | | 1,423 | | 1,372 | | 1,377 | | 1,409 | 0,002 | 0 | 0,003 | 3,8 | 184 |
| NAPHTA10 | | 1,42 | 0,003 | | 0,003 | | 0,001 | | 1,419 | | 1,424 | | 1,368 | | 1,373 | | 1,407 | 0,002 | 0,001 | 0,004 | 3,5 | 239 |
| NAPHTA15 | | 1,422 | 0,003 | | 0,001 | | 0,002 | | 1,417 | | 1,417 | | 1,373 | | 1,374 | | 1,416 | 0,002 | 0,001 | 0,002 | 1,77 | 100 |
| NAPHTA16 | | 1,421 | 0,003 | | 0,001 | | 0,002 | | 1,418 | | 1,418 | | 1,374 | | 1,375 | | 1,416 | 0,002 | 0,001 | 0,002 | 2,03 | 135 |
| NAPHTA17 | | 1,418 | 0,002 | | 0,001 | | 0,002 | | 1,416 | | 1,416 | | 1,372 | | 1,373 | | 1,413 | 0,001 | 0,001 | 0,002 | 2,87 | 170 |
| NAPHTA18 | | 1,418 | 0,002 | | 0,001 | | 0,001 | | 1,416 | | 1,417 | | 1,373 | | 1,374 | | 1,414 | 0,001 | 0,001 | 0,002 | 3,64 | 205 |
| NAPHTA23 | | 1,426 | 0,003 | | 0,001 | | 0,002 | | 1,422 | | 1,42 | | 1,377 | | 1,376 | | 1,42 | 0,001 | 0,001 | 0,002 | 4 | 10 |
| NAPHTA24 | | 1,426 | 0,003 | | 0,001 | | 0,002 | | 1,421 | | 1,42 | | 1,377 | | 1,376 | | 1,42 | 0,002 | 0,001 | 0,003 | 3,37 | 30 |
| NAPHTA25 | | 1,425 | 0,003 | | 0,001 | | 0,002 | | 1,42 | | 1,419 | | 1,375 | | 1,375 | | 1,419 | 0,001 | 0,001 | 0,002 | 3,73 | 60 |
| NAPHTA26 | | 1,424 | 0,003 | | 0,001 | | 0,002 | | 1,422 | | 1,419 | | 1,376 | | 1,375 | | 1,418 | 0,001 | 0,001 | 0,003 | 3,5 | 90 |
| NAPHTA27 | | 1,424 | 0,003 | | 0,001 | | 0,002 | | 1,422 | | 1,419 | | 1,376 | | 1,374 | | 1,418 | 0,002 | 0,001 | 0,002 | 4,01 | 120 |
| NAPHTA28 | | 1,423 | 0,003 | | 0,001 | | 0,002 | | 1,421 | | 1,418 | | 1,374 | | 1,373 | | 1,416 | 0,002 | 0,001 | 0,002 | 3,66 | 150 |
| NAPHTA29 | | 1,422 | 0,002 | | 0,001 | | 0,002 | | 1,421 | | 1,417 | | 1,373 | | 1,372 | | 1,414 | 0,001 | 0,001 | 0,002 | 4,05 | 180 |
| NAPHTA30 | | 1,422 | 0,003 | | 0,001 | | 0,002 | | 1,419 | | 1,415 | | 1,371 | | 1,37 | | 1,411 | 0,001 | 0,001 | 0,002 | 5,13 | 220 |
| NAPHTA31 | | 1,423 | 0,002 | | 0,001 | | 0,002 | | 1,421 | | 1,422 | | 1,377 | | 1,378 | | 1,419 | 0,002 | 0 | 0,003 | 2,34 | 5 |
| NAPHTA32 | | 1,424 | 0,002 | | 0,001 | | 0,001 | | 1,42 | | 1,421 | | 1,376 | | 1,375 | | 1,42 | 0,002 | 0,001 | 0,003 | 1,74 | 30 |
| NAPHTA33 | | 1,422 | 0,004 | | 0,001 | | 0,004 | | 1,424 | | 1,417 | | 1,371 | | 1,373 | | 1,423 | 0,003 | 0 | 0,003 | 3,2 | 80 |
| NAPHTA34 | | 1,42 | 0,002 | | 0,001 | | 0,001 | | 1,42 | | 1,42 | | 1,375 | | 1,377 | | 1,416 | 0,001 | 0,001 | 0,002 | 2,53 | 150 |
| NAPHTA35 | | 1,419 | 0,002 | | 0 | | 0,002 | | 1,418 | | 1,418 | | 1,375 | | 1,375 | | 1,408 | 0,002 | 0 | 0,002 | 2,52 | 220 |
| NAPHTA36 | | 1,419 | 0,003 | | 0,001 | | 0,001 | | 1,417 | | 1,414 | | 1,374 | | 1,369 | | 1,412 | 0 | 0,002 | 0,002 | 2,81 | 295 |
